# Supplementary figures and images for: Augmenting Evidence-Based Care With a Texting Mobile Interventionist: A Pilot Randomized Controlled Trial
Source: Atypon-hosted journal article supplement (doi:10.1176/appi.ps.202000239), 2020-07-07

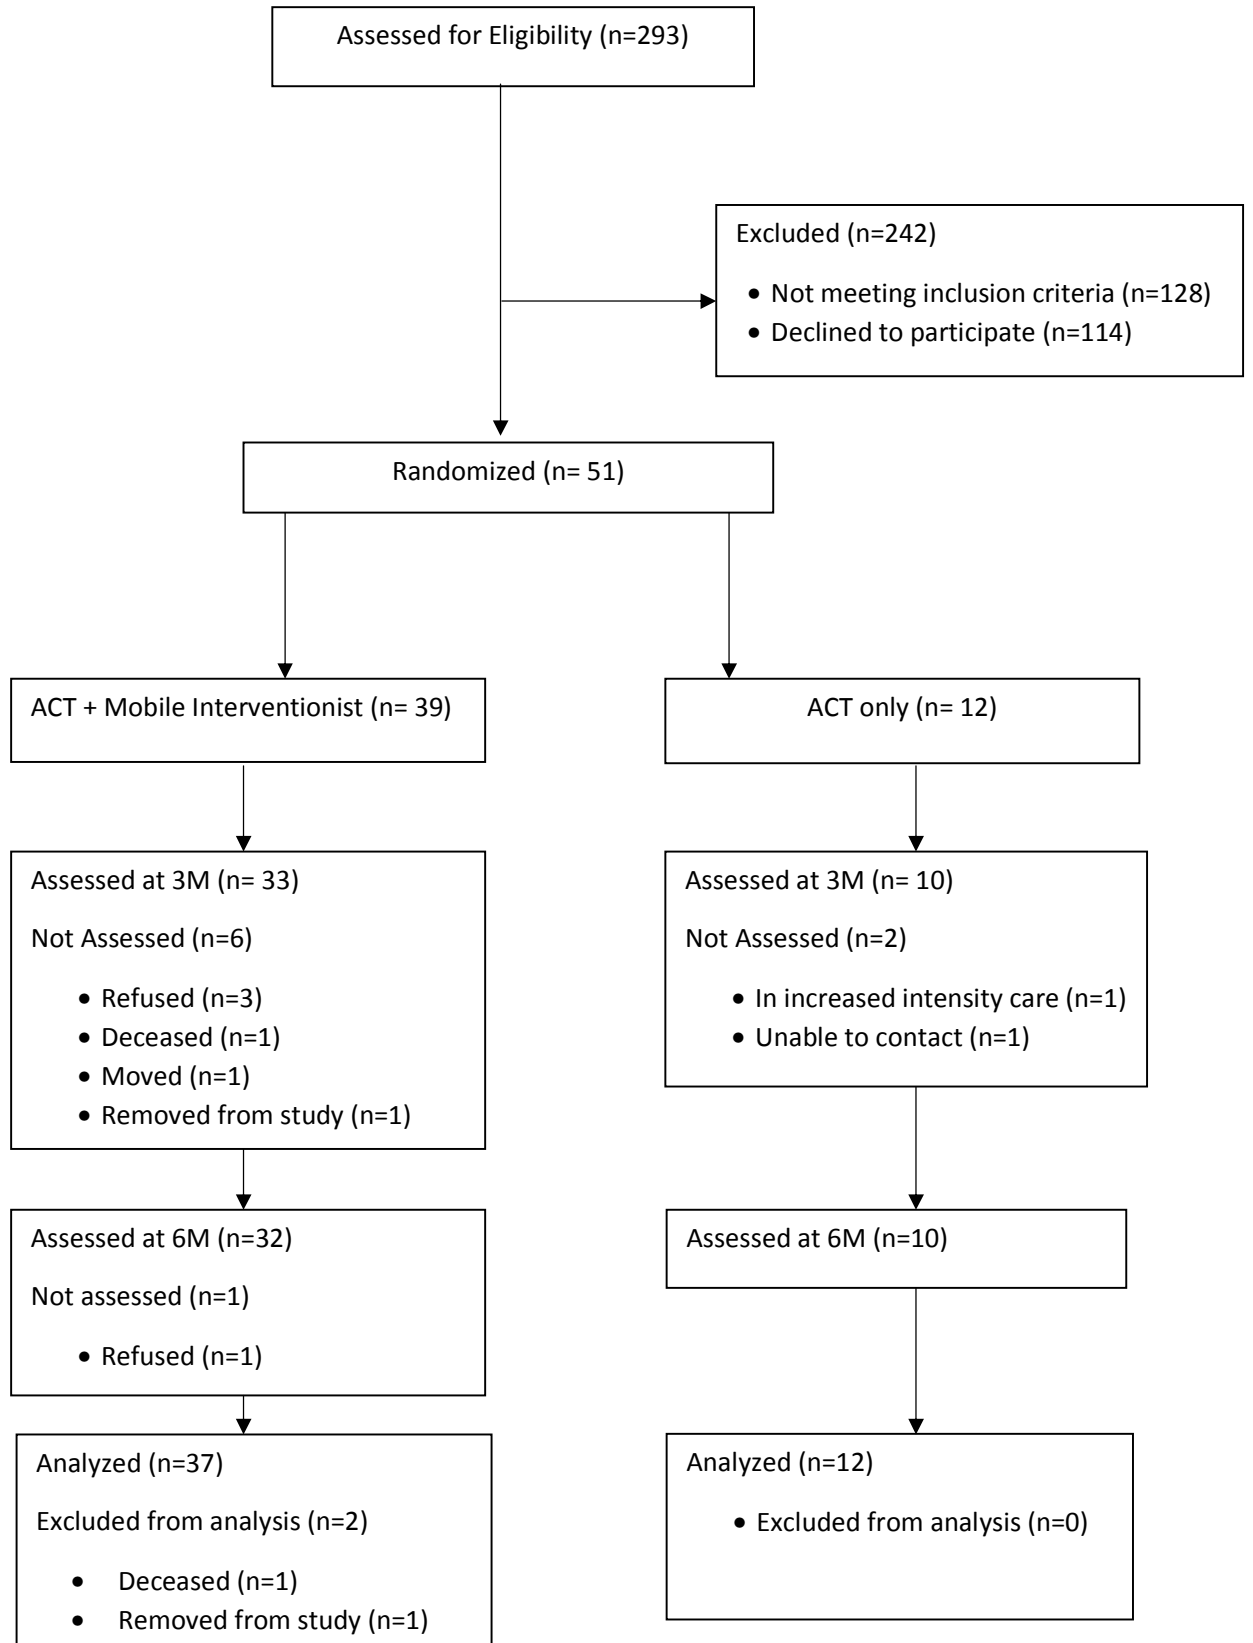

Supplement: appi.ps.202000239.ds001.pdf [file appi.ps.202000239.ds001.pdf]
